# Supplementary material for: Synthesis and structures of pyrroles fused with rigid bicyclic ring systems at β-positions†
Source: Royal Society of Chemistry journal article supplement (doi:10.1039/b006584f), 2000-01-01
Supplement: b006584f.doc [file b006584f.doc]

**Supplementary data**

**Synthesis and structures of pyrroles fused with rigid bicyclic ring systems at b-positions**

**Hidemitsu Uno,*b Satoshi Ito,a Mitsuo Wada,a Hikaru Watanabe,a Miho Nagai,a Akiko Hayashi,a Takashi Murashimaa and Noboru Onoa**

*a Department of Chemistry, Faculty of Science, Ehime University, Bunkyo-cho 2-5, Matsuyama 790-8577, Japan*

*b Advanced Instrumentation Center for Chemical Analysis, Ehime University, Bunkyo-cho 2-5, Matsuyama 790-8577, Japan*

**Ethyl 4,7-dihydro-4,7-ethano-*2H*-isoindole-1-carboxylate** (**2**) **from the disulfone 6**

The reaction of **6** (0.388 g, 1.0 mmol) with ethyl isocyanoacetate (0.125 g, 1.1 mmol) was carried out by using 3.5 mmol of potassium *t*-butoxide. Chromatographic purification (silica gel, EtOAc/hexane) gave 0.199 g (92%) of the title compound as colourless crystals.

**Ethyl 4,5,6,7-tetrahydro-4,7-ethano-*2H*-isoindole-1-carboxylate** (**3**)

The hydrogenation of **2** (0.434 g, 2.0 mmol) followed by chromatographic purification (silica gel, EtOAc/hexane) gave 0.436 g of the title compound as colourless crystals, mp 134—135 ˚C (Found: C, 70.99; H, 7.85; N, 6.24. C13H17NO2 requires: C, 71.21; H, 7.81; N, 6.39%); *R*f 0.6 (CHCl3); **H 1.33 (7H, m), 1.63 (4H, m), 2.99 (1H, m, H4), 3.52 (1H, m, H7), 4.30 (2H, q, *J* 7.0), 6.65 (1H, br s, H3) and 8.60 (1H, br s, NH); **C 14.5, 26.6, 27.2, 27.3 (C4 or C7), 27.5 (C4 or C7), 59.7, 113.9 (C3), 114.7, 129.6, 135.2 and 162.0 (CO2); **max (KBr)/cm–1 3304, 2940, 1690, 1430, 1332, 1164 and 1102; *m/z* (%) 219 (M+, 54), 190 (100), 174 (11), 162 (30), 145 (60) and 117 (22).

**Ethyl 3-iodo-4,5,6,7-tetrahydro-4,7-ethano-*2H*-isoindole-1-carboxylate** (**4**)

To a solution of the pyrrole **3** (438 mg, 2.0 mmol) in chloroform (5 mL) were added acetic acid (3.2 mL), water (0.7 mL), iodine (250 mg), and hydroiodic acid (90 mg). The mixture was refluxed for 4 h and then cooled to room temperature. Chloroform (50 mL) and saturated aq-Na2SO3 (10 mL) were added and the mixture was vigorously stirred until the colour of iodine disappeared. The organic phase was separated, washed with saturated aq-NaHCO3 (20 mL), water (20 mL) and brine (20 mL), dried over Na2SO4 and concentrated *in vacuo*. The residue was chromatographed on silica gel (CHCl3) to give 670 mg (97%) of **4** as colourless crystals, mp 162—163 ˚C (Found: C, 45.15; H, 4.63; N, 3.99. C13H16INO2 requires: C, 45.23; H, 4.67; N, 4.06%); *R*f 0.8 (CHCl3); **H 1.35 (7H, m), 1.75 (4H, m), 2.79 (1H, m, H4), 3.51 (1H, m, H7), 4.31 (2H, q, *J* 7.0) and 8.69 (1H, br s, NH); **C 14.5, 26.3, 26.8, 28.0 (C4 or C7), 28.1 (C4 or C7), 60.1, 63.4 (C3), 119.6, 135.7, 136.2 and 160.9 (CO2); **max (KBr)/cm–1 3263, 1678, 1417, 1331 and 1213; *m/z* (%) 345 (M+, 87), 316 (100), 271 (78), 243 (15), 189 (15), 143 (19) and 116 (38).

**Ethyl 3-phenyl-4,5,6,7-tetrahydro-4,7-ethano-*2H*-isoindole-1-carboxylate** (**5**)

To a solution of the iodopyrrole **4** (690 mg, 2.0 mmol), phenylboronic acid (370 mg, 3.0 mmol) and Pd(PPh3)4 (ca. 10 mg) in dry DMF (15 mL) was added a saturated aq-Na2CO3 (0.54 mL, 6 mmol) under argon and the mixture was refluxed for 5 h. The reaction was quenched by adding 5% aq-HCl (10 mL), brine (10 mL) and CHCl3 (50 mL). The organic phase was separated and concentrated *in vacuo*. The residue was chromatographed on silica gel (CHCl3) to give 510 mg (86%) of **5** as colourless crystals, mp 147—148 ˚C (Found: C, 77.04; H, 7.21; N, 4.70. C19H21NO2 requires: C, 77.26; H, 7.17; N, 4.74%); *R*f 0.7 (CHCl3); **H 1.37 (3H, t, *J* 7.0), 1.43 (4H, m), 1.80 (4H, m), 3.34 (1H, m, H4), 3.56 (1H, m, H7), 4.33 (2H, q, *J* 7.0), 7.27 (1H, m, Ar), 7.42 (2H, m), 7.52 (2H, m, Ar) and 8.70 (1H, br s, NH); **C 14.6, 26.4, 26.9, 27.4 (C4 or C7), 27.7 (C4 or C7), 59.9, 114.6, 126.2, 127.2, 128.0, 129.0, 132.4, 136.9, 162.0 (CO2), and one carbon is not found; **max (KBr)/cm–1 3311, 1670, 1452, 1288, 1276, 1265, 1174 and 1066; *m/z* (%) 295 (M+, 100), 266 (60), 238 (20), 221 (45) and 193 (38).

**Ethyl 4,7-dihydro-4,7-methano-*2H*-isoindole-1-carboxylate** (**14**)

**From 2-tosylnorbornadiene** (**16**): The reaction of **16** (0.246 g, 1.0 mmol) with ethyl isocyanoacetate (0.125 g, 1.1 mmol) was carried out by using 2 mmol of potassium *t*-butoxide. Chromatographic purification (silica gel, EtOAc/hexane) gave 0.123 g (60%) of the title compound as colourless crystals.

**From 5,6-bis(phenylsulfonyl)norbornene** (**17**): The reaction of **17** (46 mg, 0.12 mmol) with ethyl isocyanoacetate (15 mg, 0.13 mmol) was carried out by using 0.4 mmol of potassium *t*-butoxide. Chromatographic purification (silica gel, EtOAc/hexane) gave 14 mg (56%) of the title compound as colourless crystals.

**Ethyl (1S*,3aR*,4S*,7R*,7aS*,1'S*,4'R*,5'R*,6'R*)-3a-nitro-1-(6'-nitrobicyclo[2.2.1]hept-2'-en-5-yl)-3a,4,7,7a-tetrahydro-4,7-methano-*1H*-isoindole-1-carboxylate** (**15**): colourless crystals, mp 180—181 ˚C; *R*f 0.6 (CHCl3); **H 1.28 (3H, t, *J* 7.1), 1.36 (1H, m), 1.45 (1H, m), 1.57 (1H, m), 1.64 (1H, m), 2.55 (1H, m), 2.89 (1H, dd, *J* 4.7 and 2.4, H5'), 3.05 (1H, d, *J* 1.8, H7a), 3.17 (1H, m), 3.40 (1H, m), 3.59 (1H, m), 4.05—4.3 (2H, m), 5.31 (1H, dd, *J* 4.7 and 3.7, H6'), 6.00 (1H, dd, *J* 5.5 and 2.8, vinyl), 6.06 (1H, dd, *J* 5.6 and 3.0, vinyl), 6.52 (2H, m, vinyl) and 7.91 (1H, s, H3); **max (KBr)/cm–1 1736, 1550, 1531, 1338, 1253, 1219 and 721.

**Ethyl *2H*-isoindole-1-carboxylate** (**26**)

The pyrrole **2** (217 mg, 1.0 mmol) was refluxed in dry diphenyl ether (10 mL) for 1 h under argon. After concentration of the reaction mixture, the residue was chromatographed on silica gel (CHCl3) to give 28 mg (15%) of **26** as a fluorescent solid as well as 174 mg (80%) of the recovered **2**. By 1H NMR, this material of **26** was proved to be contaminated with phthalimide (*ca*. 15%). **26**: *R*f 0.55 (CHCl3); **H 1.47 (3H, t, *J* 7.1), 4.47 (2H, q, *J* 7.1), 7.11 (1H, ddd, *J* 8.7, 6.7 and 0.9, H5 or H6), 7.27 (1H, ddd, *J* 8.7, 6.7 and 1.2, H5 or H6), 7.49 (1H, br d, *J* 3.1, H3), 7.68 (1H, dt, *J* 8.7 and 0.9, H4), 8.08 (1H, br d, *J* 8.7, H7) and 11.00 (2H, br s, NH); **max (EtOH)/nm 349, 334, 262 and 255; *m/z* (%) 189 (M+, 80), 161 (4), 147 (18), 153 (100) and 115 (37).
